# Supplementary material for: BitterX: a tool for understanding bitter taste in humans
Source: PubMed Central journal article supplement (PMC4819188; doi:10.1038/srep23450), 2016-04-04
Supplement: srep23450-s1.pdf [file srep23450-s1.pdf]

## Supplementary Data

### BitterX: a tool for understanding bitter taste in humans

*Wenkang Huang*<sup>1,2,||</sup>, *Qiancheng Shen*<sup>2,||</sup>, *Xubo Su*<sup>2,||</sup>, *Mingfei Ji*<sup>2,||</sup>, *Xinyi Liu*<sup>2</sup>,  
*Yingyi Chen*<sup>2</sup>, *Shaoyong Lu*<sup>2</sup>, *Hanyi Zhuang*<sup>2,\*</sup>, *Jian Zhang*<sup>1,2,\*</sup>

<sup>1</sup> Institute of Bioinformatics and Medical Engineering, School of Electrical and Information Engineering, Jiangsu University of Technology, Changzhou, 213001, China

<sup>2</sup> Department of Pathophysiology, Key Laboratory of Cell Differentiation and Apoptosis of National Ministry of Education, Shanghai Jiao Tong University, School of Medicine, Shanghai, 200025, China.

\*Correspondence to: Jian Zhang (Phone: +86-21-63846590-776922; Fax: +86-21-64154900; Email: [jian.zhang@sjtu.edu.cn](mailto:jian.zhang@sjtu.edu.cn)) or Hanyi Zhuang (Email: [hanyizhuang@sjtu.edu.cn](mailto:hanyizhuang@sjtu.edu.cn))

<sup>||</sup>W. Huang, Q. Shen, X. Su and M. Ji contributed equally to this work.

## 1 TABLES

Table S1. The 46 physicochemical descriptors used in the model of bitterant estimation. Definitions of how the descriptors were calculated can be found in the *Handbook of Molecular Descriptors* (Todeschini and Consonni, 2000).

| Num. | Physicochemical Property                                                                                   |
|------|------------------------------------------------------------------------------------------------------------|
| 1    | Average connectivity index chi-1                                                                           |
| 2    | Binary 2 order of C and O                                                                                  |
| 3    | Binary 4 order of C and O                                                                                  |
| 4    | Binary 5 order of C and C                                                                                  |
| 5    | Binary 5 order of C and N                                                                                  |
| 6    | Binary 7 order of C and O                                                                                  |
| 7    | Binary 8 order of C and C                                                                                  |
| 8    | Broto-Moreau autocorrelation of a topological structure - lag 7 / weighted by atomic van der Waals volumes |
| 9    | Complementary Information Content 0                                                                        |
| 10   | Complementary Information Content 4                                                                        |
| 11   | Conventional bond-order ID number                                                                          |
| 12   | Difference between multiple path count and path count                                                      |
| 13   | First Mohar index                                                                                          |
| 14   | Frequency 2 order of C and N                                                                               |
| 15   | Frequency 2 order of C and O                                                                               |
| 16   | Frequency 4 order of C and C                                                                               |
| 17   | Frequency 9 order of C and O                                                                               |
| 18   | Geary autocorrelation - lag 1 / weighted by atomic polarizabilities                                        |
| 19   | Geary autocorrelation - lag 4 / weighted by atomic Sanderson electronegativities                           |
| 20   | Geary autocorrelation - lag 6 / weighted by atomic masses                                                  |
| 21   | Geary autocorrelation - lag 6 / weighted by atomic Sanderson electronegativities                           |
| 22   | Geary autocorrelation - lag 7 / weighted by atomic masses                                                  |
| 23   | Geary autocorrelation - lag 8 / weighted by atomic masses                                                  |
| 24   | Information content index 0                                                                                |
| 25   | Kier&Hall order 1                                                                                          |
| 26   | MACCS No 96                                                                                                |
| 27   | MACCS No 112                                                                                               |
| 28   | MACCS No 131                                                                                               |
| 29   | MACCS No 139                                                                                               |
| 30   | MACCS No 149                                                                                               |
| 31   | MACCS No 153                                                                                               |
| 32   | MACCS No 157                                                                                               |
| 33   | MACCS No 158                                                                                               |
| 34   | MACCS No 159                                                                                               |

|    |                                                                                  |
|----|----------------------------------------------------------------------------------|
| 35 | MACCS No 164                                                                     |
| 36 | Maximal electrotopological negative variation                                    |
| 37 | Mean topological charge index of order 4                                         |
| 38 | Mean topological charge index of order 7                                         |
| 39 | Molecular walk count of order 3                                                  |
| 40 | Moran autocorrelation - lag 2 / weighted by atomic Sanderson electronegativities |
| 41 | Moran autocorrelation - lag 5 / weighted by atomic Sanderson electronegativities |
| 42 | O atom num                                                                       |
| 43 | Rel C atom num                                                                   |
| 44 | Ring num of member 5                                                             |
| 45 | Structural information content 2                                                 |
| 46 | Total information content index 0                                                |

---

Table S2. The 20 physicochemical descriptors used in the model of hTAS2R recognition. Definitions of how the descriptors were calculated can be found in the *Handbook of Molecular Descriptors* (Todeschini and Consonni, 2000).

| Num. | Physicochemical Property                                                                              |
|------|-------------------------------------------------------------------------------------------------------|
| 1    | Average connectivity index chi-3                                                                      |
| 2    | Broto-Moreau autocorrelation of a topological structure - lag 7 / weighted by atomic polarizabilities |
| 3    | Broto-Moreau autocorrelation of a topological structure - lag 8 / weighted by atomic polarizabilities |
| 4    | Broto-Moreau autocorrelation of a topological structure - lag 8 / weighted by atomic masses           |
| 5    | Frequency of C-C at topological distance 6 (frequency 6 order of C and C)                             |
| 6    | Frequency of C-C at topological distance 7 (frequency 7 order of C and C)                             |
| 7    | Geary autocorrelation - lag 1 / weighted by atomic Sanderson electronegativities                      |
| 8    | Geary autocorrelation - lag 2 / weighted by atomic Sanderson electronegativities                      |
| 9    | Geary autocorrelation - lag 3 / weighted by atomic masses                                             |
| 10   | Geary autocorrelation - lag 7 / weighted by atomic masses                                             |
| 11   | Mean atomic polarizability (Average Pol)                                                              |
| 12   | Mean topological charge index of order 2                                                              |
| 13   | Mean topological charge index of order 3                                                              |
| 14   | Relative O atom number                                                                                |
| 15   | Moran autocorrelation - lag 2 / weighted by atomic polarizabilities                                   |
| 16   | Moran autocorrelation - lag 3 / weighted by atomic Sanderson electronegativities                      |

|    |                                                                     |
|----|---------------------------------------------------------------------|
| 17 | Moran autocorrelation - lag 5 / weighted by atomic polarizabilities |
| 18 | Self returning walk of order 10                                     |
| 19 | Structural information content 3                                    |
| 20 | Valence average connectivity index chi-6                            |

**Table S3.** The 15 receptor descriptors used in the model of hTAS2R recognition. Definitions of how the descriptors were calculated can be found in Chou, 2001 and Tian *et al.*, 2007.

| Num. | Physicochemical Property             |
|------|--------------------------------------|
| 1    | Amino Acid Hydropathy Score          |
| 2    | Normalized frequency of amino acid A |
| 3    | Normalized frequency of amino acid F |
| 4    | Normalized frequency of amino acid S |
| 5    | Normalized frequency of amino acid V |
| 6    | Normalized frequency of amino acid Y |
| 7    | Pseudo amino acid $\theta_3$         |
| 8    | Pseudo amino acid $\theta_{11}$      |
| 9    | Pseudo amino acid $\theta_{18}$      |
| 10   | Pseudo amino acid $\theta_{25}$      |
| 11   | Pseudo amino acid $\theta_{26}$      |
| 12   | Pseudo amino acid $\theta_{34}$      |
| 13   | Pseudo amino acid $\theta_{37}$      |
| 14   | Pseudo amino acid $\theta_{38}$      |
| 15   | Pseudo amino acid $\theta_{44}$      |

**Table S4.** Positive bitterant-TAS2R pairs used in the TAS2R recognition model.

| Molecule                                                                                              | Target         |
|-------------------------------------------------------------------------------------------------------|----------------|
| <chem>CC1=CC(O)C2C(CC(=C)C(CC1)O)OC(=O)C2=C</chem>                                                    | TAS2R46        |
| <chem>CN(CCOC(c1ccccc1C)c1ccccc1)C</chem>                                                             | TAS2R46        |
| <chem>Oc1cc2O[C@H](c3ccc(c(c3)O)O)[C@@H](Cc2c(c1)O)O</chem>                                           | TAS2R5,TAS2R39 |
| <chem>Oc1cc2O[C@H](c3cc(O)c(c(c3)O)O)[C@@H](Cc2c(c1)O)O</chem>                                        | TAS2R39        |
| <chem>Oc1cc(O)c2c(c1)O[C@@H]([C@@H](C2)OC(=O)c1cc(O)c(c(c1)O)O)c1c</chem><br><chem>cc(c(c1)O)O</chem> | TAS2R39        |
| <chem>OC[C@H]1O[C@@H](Oc2cc(O)c3c(c2)occ(c3=O)c2ccc(cc2)O)[C@@H]([C@@H]([C@@H]1O)O)O</chem>           | TAS2R39        |
| <chem>NC(=S)Nc1ccccc1</chem>                                                                          | TAS2R38        |
| <chem>CN1CCN(CC1)c1c(F)cc2c3c1OCC(n3cc(c2=O)C(=O)O)C</chem>                                           | TAS2R9         |
| <chem>CCN(CCNC(=O)c1ccc(cc1)N)CC</chem>                                                               | TAS2R9         |
| <chem>CN1CCN(CC1)CC(=O)N1C2CCCCC2C(=O)NC2C1NCCCC2</chem>                                              | TAS2R9         |
| <chem>CCCc1cc(=O)[nH]c(=S)[nH]1</chem>                                                                | TAS2R38        |

|                                                                                   |                                                              |
|-----------------------------------------------------------------------------------|--------------------------------------------------------------|
| CC(=O)Nc1ccc(cc1)O                                                                | TAS2R39                                                      |
| CC1=CC(=NS(=O)(=O)O1)[O-]                                                         | TAS2R44,TAS2R43                                              |
| OCc1cc(O)c2c(c1)C(C1OC(CO)C(C(C1O)O)O)c1c(C2=O)c(O)ccc1                           | TAS2R44,TAS2R43                                              |
| CC1C(=O)CC2C1C1OC(=O)C(=C)C1C(CC2=C)O                                             | TAS2R46,TAS2R43                                              |
| O=C1NS(=O)(=O)c2c1cccc2                                                           | TAS2R44,TAS2R43                                              |
| OCC1(C)C(O)CCC2(C1CCC(=C)C2C/C=C/1\C(O)COC1=O)C                                   | TAS2R46,TAS2R47,TAS2R50                                      |
| OCC1=CC2OC(=O)C(=C)C2C(CC(=CCC1)C)OC(=O)C(=C)C(CO)O                               | TAS2R46                                                      |
| OOCC1CCC2(CC1=CCC1C(C2O)OC(=O)C1=C)C                                              | TAS2R46                                                      |
| OCC(=O)C1(O)CCC2C1(C)CC(O)C1C2CCC2=CC(=O)CCC12C                                   | TAS2R46                                                      |
| S=C=NCCc1cccc1                                                                    | TAS2R38                                                      |
| N/C(=N\CCCCC/N=C(/N=C(/Nc1ccc(cc1)Cl)\N)\N)/N=C(/Nc1ccc(cc1)Cl)\N                 | TAS2R14                                                      |
| CCCC(COC(=O)N)(COC(=O)NC(C)C)C                                                    | TAS2R14                                                      |
| COC1=CC(C)C2C(C1=O)(C)C1C(=O)C(=C(C3C1(C(C2)OC(=O)C3)C)C)OC                       | TAS2R46,TAS2R47,TAS2R4,TA<br>S2R10,TAS2R14                   |
| CC1=CCCC2(C)OC2C2C(CC1)C(=C)C(=O)O2                                               | TAS2R46,TAS2R44,TAS2R1,TA<br>S2R4,TAS2R8,TAS2R10,TAS2R<br>14 |
| NC(=O)c1cccc1                                                                     | TAS2R14                                                      |
| Cn1cnc(c1Sc1ncnc2c1[nH]cn2)[N+](=O)[O-]                                           | TAS2R46,TAS2R4,TAS2R10,TA<br>S2R14                           |
| CCCCCCC/C=C/C(C#CC#CC(C=C)O)O                                                     | TAS2R43,TAS2R14                                              |
| CC(=O)OC/C=C/C(=O)C(C1C(O)CC2(C1(C)CC(=O)C1(C2CC=C2C1CC(O)C(=O)C2(C)C)C)C(O)C(C)C | TAS2R10,TAS2R14                                              |
| COc1ccc(cc1OC)Cc1nccc2c1cc(OC)c(c2)OC                                             | TAS2R7,TAS2R10,TAS2R14                                       |
| COc1ccc2c(c1OC)C(=O)OC2C1N(C)CCc2c1c(OC)c1c(c2)OCO1                               | TAS2R14                                                      |
| Oc1ccc2c(c1)oc(=O)c1c2oc2c1ccc(c2)O                                               | TAS2R39,TAS2R14                                              |
| S=C1NCCN1C                                                                        | TAS2R38                                                      |
| O=C1OCC23C(C1)OC(C2CC(=O)C1(C3CCC2(C31OC3C(=O)OC2c1cocc1)C)C(C)C                  | TAS2R38                                                      |
| CNC(=S)N                                                                          | TAS2R38                                                      |
| CC(=C)C1C2OC(=O)C1C1(C3(C2OC(=O)C23C(C1)O2)C)O                                    | TAS2R46,TAS2R47,TAS2R1,TA<br>S2R10,TAS2R14                   |
| CCc1cncn1                                                                         | TAS2R38                                                      |
| S=CN(C)C                                                                          | TAS2R38                                                      |
| S=C1NCCN1                                                                         | TAS2R38                                                      |
| CCNC(=S)N                                                                         | TAS2R38                                                      |
| CC(=CCC(=O)C1(O)C(=C(C(=O)C1CC=C(C)C)C(=O)C(C)C)O)C                               | TAS2R1,TAS2R14                                               |
| CC(=CCC(=O)C1(O)C(=C(C(=O)C1CC=C(C)C)C(=O)C(C)C)O)C                               | TAS2R1,TAS2R14                                               |
| CCC(C(=O)C1=C(O)C(C(=O)C(=C1O)CC=C(C)C)(CC=C(C)C)CC=C(C)C)C                       | TAS2R1,TAS2R14                                               |
| [O-]S(=O)(=O)NC1CCCCC1                                                            | TAS2R1,TAS2R38                                               |
| CCN(CCCC(Nc1cnc2c1ccc(c2)Cl)C)CC                                                  | TAS2R3,TAS2R10,TAS2R39,TA<br>S2R14                           |

|                                                             |                                                                                                                      |
|-------------------------------------------------------------|----------------------------------------------------------------------------------------------------------------------|
| CCC(C(=O)C1=C(O)C(C(C1=O)CC=C(C)C)(O)C(=O)CC=C(C)C)C        | TAS2R1,TAS2R14                                                                                                       |
| CCC(C(=O)C1=C(O)C(C(C1=O)CC=C(C)C)(O)C(=O)CC=C(C)C)C        | TAS2R1,TAS2R14                                                                                                       |
| CC(=O)NC(=S)N                                               | TAS2R38                                                                                                              |
| O=C1CCCCCN1                                                 | TAS2R38                                                                                                              |
| OCC1OC(OCC2OC(OC(c3ccccc3)C#N)C(C(C2O)O)O)C(C(C1O)O)O       | TAS2R16                                                                                                              |
| OCC1OC(Oc2ccc(cc2)O)C(C(C1O)O)O                             | TAS2R16                                                                                                              |
| O=C1CC2OCC=C3C4C2C2N1c1ccccc1C12CCN(C1C4)C3                 | TAS2R46,TAS2R10                                                                                                      |
| NC(=Nc1scc(n1)CSCC/C(=N/S(=O)(=O)N)/N)N                     | TAS2R44,TAS2R10                                                                                                      |
| C=CC/C(=N)OS(=O)(=O)[O-]/SC1OC(CO)C(C(C1O)O)O               | TAS2R38,TAS2R16                                                                                                      |
| C=CCN=C=S                                                   | TAS2R38                                                                                                              |
| OCC1OC(Oc2ccccc2C=O)C(C(C1O)O)O                             | TAS2R43,TAS2R16                                                                                                      |
| OCC1OC(Oc2ccccc2CO)C(C(C1O)O)O                              | TAS2R16                                                                                                              |
| C=CC1CN2CCC1CC2C(c1cnc2c1cc(OC)cc2)O                        | TAS2R46,TAS2R44,TAS2R43,TAS2R40,TAS2R4,TAS2R7,TAS2R10,TAS2R39,TAS2R14                                                |
| CC(=CCC1=C(O)C(C(=O)C(=C1O)C(=O)CC(C)C)(CC=C(C)C)CC=C(C)C)C | TAS2R1,TAS2R14                                                                                                       |
| )C                                                          |                                                                                                                      |
| OC(C(=O)c1ccccc1)c1ccccc1                                   | TAS2R10,TAS2R14                                                                                                      |
| CC(=CCC1=C(O)C(C(=O)C(=C1O)C(=O)CC(C)C)(O)CC=C(C)C)C        | TAS2R40,TAS2R1                                                                                                       |
| OCC1OC(Oc2ccccc2)C(C(C1O)O)O                                | TAS2R16                                                                                                              |
| CN(CCC(c1cccn1)c1ccc(cc1)Cl)C                               | TAS2R46,TAS2R40,TAS2R4,TAS2R7,TAS2R10,TAS2R39,TAS2R38,TAS2R14                                                        |
| CN(CCOC(c1ccccc1)c1ccccc1)C                                 | TAS2R14                                                                                                              |
| OC(c1ccccc1)(c1ccccc1)CCCN1CCCCC1                           | TAS2R49,TAS2R46,TAS2R47,TAS2R44,TAS2R43,TAS2R40,TAS2R1,TAS2R4,TAS2R7,TAS2R13,TAS2R10,TAS2R39,TAS2R38,TAS2R14,TAS2R16 |
| S=C(Nc1ccccc1)Nc1ccccc1                                     | TAS2R1,TAS2R38,TAS2R14                                                                                               |
| C=CS(=O)C=C                                                 | TAS2R14                                                                                                              |
| OC(=O)c1ccccc1Nc1cccc(c1)C(F)(F)F                           | TAS2R14                                                                                                              |
| Fc1ccc(cc1)C(=O)CCCN1CCC(CC1)(O)c1ccc(cc1)Cl                | TAS2R10,TAS2R14                                                                                                      |
| [O-]C(=O)c1ccccc1                                           | TAS2R14,TAS2R16                                                                                                      |
| OCCc1sc[n+](c1C)Cc1cnc(nc1N)C                               | TAS2R1,TAS2R39                                                                                                       |
| OCC(C(c1ccc(cc1)[N+](=O)[O-])O)NC(=O)C(Cl)Cl                | TAS2R46,TAS2R43,TAS2R1,TAS2R8,TAS2R10,TAS2R39,TAS2R41                                                                |
| OCC1OC(Oc2ccccc2CO)C(C(C1O)O)O                              | TAS2R16                                                                                                              |
| CC1CC(C)C(=O)C(C1)C(CC1CC(=O)NC(=O)C1)O                     | TAS2R10                                                                                                              |
| COc1cc2c(cc1OC)N1C3C42CCN2C4CC4C3C(CC1=O)OCC=C4C2           | TAS2R46,TAS2R4                                                                                                       |
| O=C1CC2(C(C1C)C2)C(C)C                                      | TAS2R10,TAS2R14                                                                                                      |
| Nc1ccc(cc1)S(=O)(=O)c1ccc(cc1)N                             | TAS2R40,TAS2R4,TAS2R10                                                                                               |
| COc1c(OC)cc2c(c1OC)c1ccc(c(=O)cc1C(CC2)NC(=O)C)OC           | TAS2R46,TAS2R4,TAS2R39                                                                                               |

|                                                                                                                                                               |                                                                        |
|---------------------------------------------------------------------------------------------------------------------------------------------------------------|------------------------------------------------------------------------|
| c1ccc2c(n1)c1ncccc1cc2                                                                                                                                        | TAS2R5                                                                 |
| CC[N+](Cc1ccccc1)(CC(=O)Nc1c(C)cccc1C)CC                                                                                                                      | TAS2R46,TAS2R47,TAS2R43,TA<br>AS2R4,TAS2R8,TAS2R13,TAS2<br>R10,TAS2R39 |
| CC(=O)OC(/C=C/C(=O)C(C1C(O)CC2(C1(C)CC(=O)C1(C2CC=C2C1C=C<br>C(O)C(=O)C2(C)C)C)C(O)C)C)C                                                                      | TAS2R10                                                                |
| OC(COc1ccccc2c1c(=O)cc(o2)C(=O)O)COc1ccc2c(c1)c(=O)cc(o2)C(=O)O                                                                                               | TAS2R49,TAS2R43,TAS2R7                                                 |
| CC(=CCc1c(O)cc(c2c1OC(CC2=O)c1ccc(cc1)O)O)C                                                                                                                   | TAS2R14                                                                |
| Cc1cc(O)nc(n1)S                                                                                                                                               | TAS2R38                                                                |
| Oc1cc(O)c2c(c1)O[C@@H]([C@H]([C@@H]2c1c(O)cc(c2c1O[C@H](c1c<br>cc(c(c1)O)O)[C@H]([C@@H]2c1c(O)cc(c2c1O[C@H]([C@H](C2)O)c1<br>ccc(c(c1)O)O)O)O)c1ccc(c(c1)O)O  | TAS2R5                                                                 |
| C[C@@H]1C(=O)O[C@H]2[C@H]1CC[C@@]1(C2=C(C)C(=O)C=C1)C                                                                                                         | TAS2R10                                                                |
| OC[C@H]1O[C@@H](Oc2cc3c(O)cc(cc3[o+]c2c2cc(OC)c(c(c2)OC)O)O)[<br>C@@H]([C@H]([C@@H]1O)O)O                                                                     | TAS2R5,TAS2R7                                                          |
| O=C(c1cc(O)c(c(c1)O)O)O[C@@H]1[C@@H](OC(=O)c2cc(O)c(c(c2)O)<br>O)[C@@H](OC([C@@H]1OC(=O)c1cc(O)c(c(c1)O)O)OC(=O)c1cc(O)c(c<br>(c1)O)O)OC(=O)c1cc(O)c(c(c1)O)O | TAS2R39                                                                |
| O=CC1(CC(c2cocc2)O)C(C)C(OC(=O)C)CC2(C1CCC(C2(C)O)O)C                                                                                                         | TAS2R46,TAS2R47,TAS2R1,TA<br>S2R10,TAS2R14                             |
| O=c1ccc2c(o1)ccccc2                                                                                                                                           | TAS2R10,TAS2R14                                                        |
| Cn1cnc2c1c(=O)n(C)c(=O)n2C                                                                                                                                    | TAS2R46,TAS2R43,TAS2R7,TA<br>S2R10,TAS2R14                             |
| O=C1OC(=O)C2(C(C1CC2)(C)C)C                                                                                                                                   | TAS2R47,TAS2R4,TAS2R10,TA<br>S2R14                                     |
| COc1ccccc2c1cc([N+](=O)[O-])c1c2c2OCOc2cc1C(=O)O                                                                                                              | TAS2R44,TAS2R43,TAS2R14                                                |
| CC1=CC2OC(=O)C(=C)C2CCC(=C)C(CC1)O                                                                                                                            | TAS2R46,TAS2R47,TAS2R4,TA<br>S2R10,TAS2R14                             |
| CC1=CCC23C1C1OC(=O)C(C1CCC3(O2)C)C                                                                                                                            | TAS2R46,TAS2R43,TAS2R1,TA<br>S2R4,TAS2R10,TAS2R14                      |
| CC1=CCC23C1C1OC(=O)C(=C)C1CCC3(O2)C                                                                                                                           | TAS2R46,TAS2R43,TAS2R10,T<br>AS2R14                                    |
| CC1C(=O)OC2C1CCC(C1C2=C(C)C2C1C1C3C2(C(=C1)C)C1OC(=O)C(<br>C1CCC3(C)O)C)C)O                                                                                   | TAS2R46,TAS2R47,TAS2R10,T<br>AS2R14                                    |
| COc1ccc2c(c1)C13CCCCC3C(C2)N(CC1)C                                                                                                                            | TAS2R1,TAS2R10                                                         |
| COc1cc(O)c(c(c1C(=O)/C=C/c1ccc(cc1)O)O)CC=C(C)C                                                                                                               | TAS2R40,TAS2R1,TAS2R14                                                 |
| COc1cc(O)c(c2c1C(=O)CC(O2)c1ccc(cc1)O)CC=C(C)C                                                                                                                | TAS2R40,TAS2R1,TAS2R14                                                 |
| CC(=CCC1=C(O)C(C(=O)C(=C1O)C(=O)C(C)C)(CC=C(C)C)CC=C(C)C)<br>C                                                                                                | TAS2R40,TAS2R1                                                         |
| CC(=CCC1=C(O)C(C(=O)C(=C1O)C(=O)C(C)C)(O)CC=C(C)C)C                                                                                                           | TAS2R40,TAS2R1                                                         |
| CCC(C(=O)C1=C(O)C(C(=O)C(C1=O)CC=C(C)C)(O)CC=C(C)C)C                                                                                                          | TAS2R46,TAS2R47,TAS2R43,T<br>AS2R1,TAS2R4,TAS2R39,TAS2<br>R50          |
| OCC1OC(OC2OC=C3C(C2C=C)CCOC3=O)C(C(C1O)O)OC(=O)c1c(O)cc<br>(cc1c1ccccc(c1)O)O                                                                                 |                                                                        |

|                                                                           |                                       |
|---------------------------------------------------------------------------|---------------------------------------|
| <chem>COC(=O)C1C(O)CCC2C1CC1N(C2)CCc2c1[nH]c1c2cccc1</chem>               | TAS2R46,TAS2R1,TAS2R4,TAS2R10,TAS2R38 |
| <chem>CC(CC(=O)C1=C(O)C(C(C1=O)CC=C(C)C)(O)C(=O)CC=C(C)C)C</chem>         | TAS2R1,TAS2R14                        |
| <chem>Oc1cc(O)c2c(c1)O[C@@H]([C@@H](C2)OC(=O)c1cc(O)c(c(c1)O)O)c1c</chem> | TAS2R39                               |
| <chem>c(O)c(c(c1)O)O</chem>                                               |                                       |
| <chem>Oc1ccc(cc1)[C@H]1COc2c(C1)ccc(c2)O</chem>                           | TAS2R39,TAS2R14                       |
| <chem>Oc1ccc(cc1)c1coc2c(c1=O)c(O)cc(c2)O</chem>                          | TAS2R39,TAS2R14                       |

**Table S5.** Negative bitterant-TAS2R pairs used in the TAS2R recognition model.

| Molecule                                                                 | Target                    |
|--------------------------------------------------------------------------|---------------------------|
| <chem>CC1=CC(O)C2C(CC(=C)C(CC1)O)OC(=O)C2=C</chem>                       | TAS2R43, TAS2R47, TAS2R9  |
| <chem>CN(CCOC(c1ccccc1C)c1ccccc1)C</chem>                                | TAS2R48, TAS2R8, TAS2R60  |
| <chem>OCC1OC(OCC2OC(O)C(C(C2O)O)O)C(C(C1O)O)O</chem>                     | TAS2R1                    |
| <chem>Oc1cc2O[C@H](c3ccc(c(c3)O)O)[C@@H](Cc2c(c1)O)O</chem>              | TAS2R4                    |
| <chem>Oc1cc2O[C@H](c3cc(O)c(c(c3)O)O)[C@@H](Cc2c(c1)O)O</chem>           | TAS2R47                   |
| <chem>Oc1cc(O)c2c(c1)O[C@@H]([C@@H](C2)OC(=O)c1cc(O)c(c(c1)O)O)c1</chem> | TAS2R1, TAS2R16, TAS2R4   |
| <chem>ccc(c(c1)O)O</chem>                                                |                           |
| <chem>OC[C@H]1O[C@@H](Oc2cc(O)c3c(c2)occ(c3=O)c2ccc(cc2)O)[C@@H]</chem>  | TAS2R43                   |
| <chem>][C@H]([C@@H]1O)O)O</chem>                                         |                           |
| <chem>CCN(CCCC(Nc1ccnc2c1ccc(c2)Cl)C)CC</chem>                           | TAS2R60, TAS2R5, TAS2R49  |
| <chem>CN1CCN(CC1)c1c(F)cc2c3c1OCC(n3cc(c2=O)C(=O)O)C</chem>              | TAS2R42, TAS2R46          |
| <chem>CCN(CCN(C=O)c1ccc(cc1)N)CC</chem>                                  | TAS2R13, TAS2R43, TAS2R46 |
| <chem>CN1CCN(CC1)CC(=O)N1C2CCCCC2C(=O)NC2C1NCCCC2</chem>                 | TAS2R8, TAS2R43, TAS2R10  |
| <chem>CCCc1cc(=O)[nH]c(=S)[nH]1</chem>                                   | TAS2R60, TAS2R50, TAS2R16 |
| <chem>CC(=O)Nc1ccc(cc1)O</chem>                                          | TAS2R9, TAS2R7, TAS2R16   |
| <chem>CC1=CC(=NS(=O)(=O)O1)[O-]</chem>                                   | TAS2R39, TAS2R40          |
| <chem>OCc1cc(O)c2c(c1)C(C1OC(CO)C(C(C1O)O)O)c1c(C2=O)c(O)ccc1</chem>     | TAS2R1, TAS2R3            |
| <chem>CC1C(=O)CC2C1C1OC(=O)C(=C)C1C(CC2=C)O</chem>                       | TAS2R44, TAS2R47, TAS2R9  |
| <chem>O=C1NS(=O)(=O)c2c1ccccc2</chem>                                    | TAS2R10, TAS2R5, TAS2R45  |
| <chem>OCC1(C)C(O)CCC2(C1CCC(=C)C2C/C=C/1\C(O)COC1=O)C</chem>             | TAS2R9, TAS2R14           |
| <chem>OCC1=CC2OC(=O)C(=C)C2C(CC(=CCC1)C)OC(=O)C(=C)C(CO)O</chem>         | TAS2R40, TAS2R50, TAS2R14 |
| <chem>OOCC1CCC2(CC1=CCC1C(C2O)OC(=O)C1=C)C</chem>                        | TAS2R45, TAS2R10, TAS2R43 |
| <chem>OCC(=O)C1(O)CCC2C1(C)CC(O)C1C2CCC2=CC(=O)CCC12C</chem>             | TAS2R42, TAS2R38          |
| <chem>N/C(=N\CCCCC/N=C/N=C/Nc1ccc(cc1)Cl)\N)\N)/N=C/Nc1ccc(cc1)</chem>   | TAS2R42, TAS2R5, TAS2R44  |
| <chem>Cl)\N</chem>                                                       |                           |
| <chem>CCCC(COC(=O)N)(COC(=O)NC(C)C)C</chem>                              | TAS2R3, TAS2R38           |
| <chem>COC1=CC(C)C2C(C1=O)(C)C1C(=O)C=C(C3C1(C(C2)OC(=O)C3)C)C</chem>     | TAS2R5, TAS2R50           |
| <chem>)OC</chem>                                                         |                           |
| <chem>CC1=CCCC2(C)OC2C2C(CC1)C(=C)C(=O)O2</chem>                         | TAS2R7, TAS2R50           |
| <chem>NC(=O)c1ccccc1</chem>                                              | TAS2R38, TAS2R44          |
| <chem>Cn1nc(c1Sc1ncnc2c1[nH]cn2)[N+](=O)[O-]</chem>                      | TAS2R7, TAS2R38           |
| <chem>CCCCCCC/C=C/C(C#CC#CC(C=C)O)O</chem>                               | TAS2R9, TAS2R42           |
| <chem>CC(=O)OC/C=C/C(=O)C(C1C(O)CC2(C1(C)CC(=O)C1(C2CC=C2)C1C</chem>     | TAS2R45, TAS2R43, TAS2R42 |



|                                                                      |                           |
|----------------------------------------------------------------------|---------------------------|
| <chem>C(O)C(=O)C2(C)C)C(O)C(C)C</chem>                               |                           |
| <chem>COc1ccc(cc1OC)Cc1nccc2c1cc(OC)c(c2)OC</chem>                   | TAS2R46                   |
| <chem>COc1ccc2c(c1OC)C(=O)OC2C1N(C)CCc2c1c(OC)c1c(c2)OCO1</chem>     | TAS2R50, TAS2R42          |
| <chem>Oc1ccc2c(c1)oc(=O)c1c2oc2c1ccc(c2)O</chem>                     | TAS2R7, TAS2R40           |
| <chem>S=C1NCCN1C</chem>                                              | TAS2R5, TAS2R60, TAS2R39  |
| <chem>O=C1OCC23C(C1)OC(C2CC(=O)C1(C3CCC2(C31OC3C(=O)OC2c1coc</chem>  | TAS2R1, TAS2R14           |
| <chem>c1)C)C(C)C</chem>                                              |                           |
| <chem>CNC(=S)N</chem>                                                | TAS2R60, TAS2R44, TAS2R14 |
| <chem>Cc1cc(O)nc(n1)S</chem>                                         | TAS2R5, TAS2R13           |
| <chem>CCc1cnccn1</chem>                                              | TAS2R3, TAS2R10           |
| <chem>S=CN(C)C</chem>                                                | TAS2R40, TAS2R1           |
| <chem>S=C1NCCN1</chem>                                               | TAS2R48, TAS2R1           |
| <chem>CCNC(=S)N</chem>                                               | TAS2R16, TAS2R8           |
| <chem>CC(=CCC(=O)C1(O)C(=C(C(=O)C1CC=C(C)C)C(=O)C(C)C)O)C</chem>     | TAS2R16, TAS2R47, TAS2R10 |
| <chem>CC(=CCC(=O)C1(O)C(=C(C(=O)C1CC=C(C)C)C(=O)C(C)C)O)C</chem>     | TAS2R4, TAS2R40           |
| <chem>CCC(C(=O)C1=C(O)C(C(=O)C(=C1O)CC=C(C)C)(CC=C(C)C)CC=C(C</chem> | TAS2R16, TAS2R60          |
| <chem>)C)C</chem>                                                    |                           |
| <chem>NC(=S)Nc1cccc1</chem>                                          | TAS2R16, TAS2R14, TAS2R13 |
| <chem>S=C=NCCc1cccc1</chem>                                          | TAS2R13, TAS2R60, TAS2R39 |
| <chem>CCC(C(=O)C1=C(O)C(C(C1=O)CC=C(C)C)(O)C(=O)CC=C(C)C)C</chem>    | TAS2R45, TAS2R44, TAS2R39 |
| <chem>CCC(C(=O)C1=C(O)C(C(C1=O)CC=C(C)C)(O)C(=O)CC=C(C)C)C</chem>    | TAS2R9, TAS2R47           |
| <chem>CC(=O)NC(=S)N</chem>                                           | TAS2R1, TAS2R50           |
| <chem>O=C1CCCCCN1</chem>                                             | TAS2R5, TAS2R48, TAS2R60  |
| <chem>OCC1OC(OCC2OC(OC(c3ccccc3)C#N)C(C(C2O)O)O)C(C(C1O)O)O</chem>   | TAS2R40                   |
| <chem>OCC1OC(Oc2ccc(cc2)O)C(C(C1O)O)O</chem>                         | TAS2R38, TAS2R7           |
| <chem>O=C1CC2OCC=C3C4C2C2N1c1cccc1C12CCN(C1C4)C3</chem>              | TAS2R9                    |
| <chem>NC(=Nc1sc(n1)CSCC/C(=N/S(=O))(=O)N)/N)N</chem>                 | TAS2R7, TAS2R16           |
| <chem>C=CC/C(=N)OS(=O)(=O)[O-]/SC1OC(CO)C(C(C1O)O)O</chem>           | TAS2R44, TAS2R3, TAS2R10  |
| <chem>C=CCN=C=S</chem>                                               | TAS2R48, TAS2R44          |
| <chem>OCC1OC(Oc2ccccc2C=O)C(C(C1O)O)O</chem>                         | TAS2R40                   |
| <chem>OCC1OC(Oc2ccccc2CO)C(C(C1O)O)O</chem>                          | TAS2R38, TAS2R39          |
| <chem>C=CC1CN2CCC1CC2C(c1cnc2c1cc(OC)cc2)O</chem>                    | TAS2R50                   |
| <chem>CC(=CCC1=C(O)C(C(=O)C(=C1O)C(=O)CC(C)C)(CC=C(C)C)CC=C(C</chem> | TAS2R46                   |
| <chem>)C)C</chem>                                                    |                           |
| <chem>OC(C(=O)c1cccc1)c1cccc1</chem>                                 | TAS2R48, TAS2R8, TAS2R38  |
| <chem>CC(=CCC1=C(O)C(C(=O)C(=C1O)C(=O)CC(C)C)(O)CC=C(C)C)C</chem>    | TAS2R4, TAS2R48           |
| <chem>OCC1OC(Oc2ccccc2)C(C(C1O)O)O</chem>                            | TAS2R50, TAS2R47, TAS2R13 |
| <chem>CN(CCC(c1ccccc1)c1ccc(cc1)Cl)C</chem>                          | TAS2R48, TAS2R3, TAS2R49  |
| <chem>CN(CCOC(c1ccccc1)c1cccc1)C</chem>                              | TAS2R1, TAS2R42, TAS2R9   |
| <chem>OC(c1ccccc1)(c1cccc1)CCCN1CCCC1</chem>                         | TAS2R3                    |
| <chem>S=C(Nc1cccc1)Nc1cccc1</chem>                                   | TAS2R44, TAS2R49, TAS2R45 |
| <chem>C=CS(=O)C=C</chem>                                             | TAS2R42                   |
| <chem>OC(=O)c1cccc1Nc1cccc(c1)C(F)(F)F</chem>                        | TAS2R42, TAS2R7, TAS2R39  |
| <chem>Fc1ccc(cc1)C(=O)CCCN1CCC(CC1)(O)c1ccc(cc1)Cl</chem>            | TAS2R60, TAS2R39          |

|                                                                                                                                                       |                           |
|-------------------------------------------------------------------------------------------------------------------------------------------------------|---------------------------|
| [O-]C(=O)c1ccccc1                                                                                                                                     | TAS2R43, TAS2R8, TAS2R42  |
| OCCc1sc[n+](c1C)Cc1cnc(nc1N)C                                                                                                                         | TAS2R8, TAS2R49           |
| OCC(C(c1ccc(cc1)[N+](=O)[O-])O)NC(=O)C(Cl)Cl                                                                                                          | TAS2R40, TAS2R14, TAS2R5  |
| O=C(c1cc(O)c(c(c1)O)O)O[C@@H]1[C@@H](OC(=O)c2cc(O)c(c(c2)O)O)[C@@H](OC([C@@H]1OC(=O)c1cc(O)c(c(c1)O)O)OC(=O)c1cc(O)c(c(c1)O)O)OC(=O)c1cc(O)c(c(c1)O)O | TAS2R4, TAS2R49, TAS2R46  |
| CCC1CN2CCc3c(C2CC1CC1NCCc2c1cc(OC)c(c2)OC)cc(c(c3)OC)OC                                                                                               | TAS2R13                   |
| OCC1OC(Oc2ccccc2CO)C(C(C1O)O)O                                                                                                                        | TAS2R45, TAS2R7, TAS2R47  |
| CC1CC(C)C(=O)C(C1)C(CC1CC(=O)NC(=O)C1)O                                                                                                               | TAS2R9, TAS2R43, TAS2R46  |
| COc1cc2c(cc1OC)N1C3C42CCN2C4CC4C3C(CC1=O)OCC=C4C2                                                                                                     | TAS2R43, TAS2R8, TAS2R47  |
| O=C1CC2(C(C1C)C2)C(C)C                                                                                                                                | TAS2R4, TAS2R48, TAS2R38  |
| Nc1ccc(cc1)S(=O)(=O)c1ccc(cc1)N                                                                                                                       | TAS2R46, TAS2R47, TAS2R14 |
| O=C1OC2C(C1C)(O)C13C4(C2)C(OC3=O)CC(C24C(O1)OC(=O)C2O)C(C)(C)C                                                                                        | TAS2R8, TAS2R16, TAS2R9   |
| c1ccc2c(n1)c1cccc1cc2                                                                                                                                 | TAS2R14, TAS2R38, TAS2R45 |
| CC[N+](Cc1ccccc1)(CC(=O)Nc1c(C)cccc1C)CC                                                                                                              | TAS2R49, TAS2R48, TAS2R1  |
| CC(=O)OC(/C=C/C(=O)C(C1C(O)CC2(C1(C)CC(=O)C1(C2CC=C2C1C=C(O)C(=O)C2(C)C)C)(O)C)(C)C                                                                   | TAS2R50, TAS2R45, TAS2R46 |
| OC(COc1cccc2c1c(=O)cc(o2)C(=O)O)COc1ccc2c(c1)c(=O)cc(o2)C(=O)O                                                                                        | TAS2R3, TAS2R40           |
| CC(=CCc1c(O)cc(c2c1OC(CC2=O)c1ccc(cc1)O)O)C                                                                                                           | TAS2R43, TAS2R10          |
| CC(=C)C1C2OC(=O)C1C1(C3(C2OC(=O)C23C(C1)O2)C)O                                                                                                        | TAS2R13, TAS2R49, TAS2R48 |
| Oc1cc(O)c2c(c1)O[C@@H]([C@H]([C@@H]2c1c(O)cc(c2c1O[C@H](c1ccc(c(c1)O)O)[C@H]([C@@H]2c1c(O)cc(c2c1O[C@H]([C@H](C2)O)c1ccc(c(c1)O)O)O)O)c1ccc(c(c1)O)O  | TAS2R45, TAS2R14          |
| C[C@@H]1C(=O)O[C@H]2[C@H]1CC[C@@]1(C2=C(C)C(=O)C=C1)C                                                                                                 | TAS2R16, TAS2R5, TAS2R47  |
| C/C1=C\C[C@H]2OC(=O)C(=C)[C@@H]2CC/C(=C/CC1)/C                                                                                                        | TAS2R60, TAS2R8, TAS2R1   |
| Oc1cc2O[C@H](c3ccc(c(c3)O)O)[C@H](Cc2c(c1)O)O                                                                                                         | TAS2R39                   |
| OC[C@H]1O[C@@H](Oc2cc3c(O)cc(cc3[o+]c2c2cc(OC)c(c(c2)OC)O)O)[C@@H]([C@H]([C@@H]1O)O)O                                                                 | TAS2R13, TAS2R4, TAS2R49  |
| NCCS(=O)(=O)O                                                                                                                                         | TAS2R43, TAS2R4, TAS2R39  |
| O=CC1(CC(c2cocc2)O)C(C)C(OC(=O)C)CC2(C1CCC(C2(C)O)O)C                                                                                                 | TAS2R50, TAS2R4           |
| O=c1ccc2c(o1)cccc2                                                                                                                                    | TAS2R38, TAS2R39          |
| Cn1cnc2c1c(=O)n(C)c(=O)n2C                                                                                                                            | TAS2R3, TAS2R13, TAS2R44  |
| [O-]S(=O)(=O)NC1CCCCC1                                                                                                                                | TAS2R45, TAS2R14, TAS2R7  |
| COc1cccc2c1cc([N+](=O)[O-])c1c2c2OCOc2cc1C(=O)O                                                                                                       | TAS2R49, TAS2R13          |
| CC1=CC2OC(=O)C(=C)C2CCC(=C)C(CC1)O                                                                                                                    | TAS2R40, TAS2R45, TAS2R44 |
| CC1=CCC23C1C1OC(=O)C(C1CCC3(O2)C)C                                                                                                                    | TAS2R50, TAS2R8           |
| CC1=CCC23C1C1OC(=O)C(=C)C1CCC3(O2)C                                                                                                                   | TAS2R48, TAS2R3, TAS2R8   |
| CC1C(=O)OC2C1CCC(C1C2=C(C)C2C1C1C3C2(C(=C1)C)C1OC(=O)C(C1CCC3(C)O)C)(C)O                                                                              | TAS2R5, TAS2R1, TAS2R39   |
| COc1ccc2c(c1)C13CCCCC3C(C2)N(CC1)C                                                                                                                    | TAS2R14                   |
| COc1cc(O)c(c(c1C(=O)/C=C/c1ccc(cc1)O)O)CC=C(C)C                                                                                                       | TAS2R9, TAS2R49, TAS2R42  |

|                                                                       |                          |
|-----------------------------------------------------------------------|--------------------------|
| <chem>COc1cc(O)c(c2c1C(=O)CC(O2)c1ccc(cc1)O)CC=C(C)C</chem>           | TAS2R3                   |
| <chem>CC(=CCC1=C(O)C(C(=O)C(=C1O)C(=O)C(C)C)(CC=C(C)C)CC=C(C)C</chem> | TAS2R5                   |
| <chem>C)C</chem>                                                      |                          |
| <chem>CC(=CCC1=C(O)C(C(=O)C(=C1O)C(=O)C(C)C)(O)CC=C(C)C)C</chem>      | TAS2R38                  |
| <chem>CCC(C(=O)C1=C(O)C(C(=O)C(C1=O)CC=C(C)C)(O)CC=C(C)C)C</chem>     | TAS2R13, TAS2R10         |
| <chem>OCC1OC(OC2OC=C3C(C2C=C)CCOC3=O)C(C(C1O)O)OC(=O)c1c(O)</chem>    | TAS2R16, TAS2R10         |
| <chem>cc(cc1c1cccc(c1)O)O</chem>                                      |                          |
| <chem>COC(=O)C1C(O)CCC2C1CC1N(C2)CCc2c1[nH]c1c2cccc1</chem>           | TAS2R3                   |
| <chem>CC(CC(=O)C1=C(O)C(C(C1=O)CC=C(C)C)(O)C(=O)CC=C(C)C)C</chem>     | TAS2R4, TAS2R7           |
| <chem>CC(=O)c1cncn1</chem>                                            | TAS2R47                  |
| <chem>O=C1OC(=O)C2(C(C1CC2)(C)C)C</chem>                              | TAS2R46                  |
| <chem>Oc1ccc(cc1)[C@H]1COc2c(C1)ccc(c2)O</chem>                       | TAS2R7, TAS2R40, TAS2R44 |
| <chem>Oc1ccc(cc1)c1coc2c(c1=O)c(O)cc(c2)O</chem>                      | TAS2R60, TAS2R4, TAS2R49 |

**Table S6.** The in-house library composed of 220 chemical probes in the SMILES format.

| Num. | Fragments                                                     |
|------|---------------------------------------------------------------|
| 1    | <chem>ON1C(C)(C)CC(CC1(C)C)N=C=S</chem>                       |
| 2    | <chem>FC1(F)C(F)(F)OS1(=O)=O</chem>                           |
| 3    | <chem>c1(noc(c1)c1ccc(cc1)Br)C(=O)O</chem>                    |
| 4    | <chem>N#CCc1c(C)c(C)c(c(c1C)C)C</chem>                        |
| 5    | <chem>O/N=C(\Cc1cccc1)/C</chem>                               |
| 6    | <chem>C[Si]1(C)N[Si](C)(C)N[Si](N1)(C)C</chem>                |
| 7    | <chem>C[Si](P([Si](C)(C)C)[Si](C)(C)C)(C)C</chem>             |
| 8    | <chem>N#CCCS1sc(=O)sc1SCCC#N</chem>                           |
| 9    | <chem>c1(csc(n1)C)C(=O)OCC</chem>                             |
| 10   | <chem>FS(=O)(=O)C(F)(F)F</chem>                               |
| 11   | <chem>Sc1nc(=O)n2c(n1)ccc(c2)Cl</chem>                        |
| 12   | <chem>C12(CC(=O)N(C(=O)C1)CCC)CCCC2</chem>                    |
| 13   | <chem>N#CC1=CC[C@@]23[C@@]1(CCC2)C(=CC3)C#N</chem>            |
| 14   | <chem>FCCN1CCN(CC1)C(=O)Cl</chem>                             |
| 15   | <chem>O[C@H]1C[C@@H](C)[C@H]2[C@H](C=C1)C)CC(=C(C)C)C2</chem> |
| 16   | <chem>Nc1nc(N)nc(n1)N</chem>                                  |
| 17   | <chem>CN([Si](N(C)C)(N(C)C)C)C</chem>                         |
| 18   | <chem>[C@]12([C@@H](O1)C[C@@H](CC2)C(=C)C)C</chem>            |
| 19   | <chem>N(CCCCCC)(CCCCC)N=O</chem>                              |
| 20   | <chem>C(=O)(N1CCN(CC1)CC=C)CC(=O)NN</chem>                    |
| 21   | <chem>Fc1ccc2c3c1ccc1c3c(cc2)ccc1</chem>                      |
| 22   | <chem>CCCN1CCC(=O)CC1</chem>                                  |
| 23   | <chem>c12c([nH]nc1O)cc(cc2Cl)I</chem>                         |
| 24   | <chem>FC(C1=[NH]S(=O)(=O)NC(=C1)C)(F)F</chem>                 |
| 25   | <chem>Fc1ccc(c2c1cn[nH]2)I</chem>                             |
| 26   | <chem>c1nc(=O)c(c[nH]1)Br</chem>                              |

27 COc1ccc(cc1)c1ncc[nH]1  
28 C[SiH](C(C)(C)C)C(C)(C)C  
29 COCCN1CCN(CC1)CC[N]#C  
30 c1(c(c(cc(c1)/C=C\C(=O)O)OC)OC)S(=O)(=O)Nc1ccc(cc1)C(=O)O  
31 c12c([nH]c(c1)C(=O)OC)cccc2  
32 c1(cc(cc(c1)C(C)C)C(C)C)C(C)C  
33 O[C@H]1CCC(=C1)I  
34 C1(=O)[C@H]2[C@@H](C1)C=CC2  
35 CCN1CCOCC1  
36 CCOP(OP(OCC)OCC)OCC  
37 c1(n2cccc2)ccc(en1)I  
38 FC(=C(C(F)(F)F)Br)F  
39 CC([NH2]NC(C)(C)C)(C)C  
40 COP(=O)(SCc1nc(N)nc(n1)N)OC  
41 COCCOCOCCOC  
42 C12([C@@H](O1)C(=O)OC)CCCCC2  
43 CN(/C=N/c1cc[nH]c(=O)n1)C  
44 COC1CSC1  
45 Cl[C@H]1CC[C@@H]2[C@@H](C1)NON2O  
46 Fc1ccc(c2c1cn[nH]2)Br  
47 BrC[C@@H]1CC[C@H](O1)c1ccncc1  
48 O=CCC(C(C(F)(F)F)(F)F)(F)F  
49 n12c(=NCC1)ssc2=S  
50 Brc1n[nH]cn1  
51 CC(SSC(C)(C)C)(C)C  
52 CC1CCN(CC1)CCCS(=O)(=O)O  
53 o1nc2c(n1)nc1c(n2)[nH]c2c([nH]1)c1nsnc1cc2  
54 C12=CNCCC[C@@H]1C=C(C=C2)OC  
55 C\1=C/C=N\[C@H]2C[C@@H]2N/C=C/C=N\[C@@H]2[C@@H](N1)C2  
56 COP(=O)OC  
57 N#Cc1ncn2c1nmn(c2=O)C  
58 O=S1(=O)CC=CC1  
59 c1(/C=C\2/C(=C(C=N2)C)C)c(c(c[nH]1)C)C  
60 CSc1scc(c1)/C=N/NC(=O)N  
61 O=CN1CCN(CC1)C=O  
62 Cc1cc(C)nc(n1)Nc1ccc(cc1)OC(F)(F)F  
63 ICC(C(F)F)(F)F  
64 C[C@H]1CCCC[C@H]1N[C@H]1CCS(=O)(=O)C1  
65 C1CCCC(CC1)NC1CCOCC1  
66 c1(mnc1)SCC(=O)N  
67 OCCCCCCCCCCCCO  
68 C1=CC=CC=c2c(=C1)nc1cccc1n2  
69 NCCOCCN  
70 c1(c(ccn(c1=O)C)OC)C#N

71 S(Cc1nnn[nH]1)Cc1nnn[nH]1  
72 CN1CCN(CC1)C(=O)NC(C)(C)C  
73 CN1CCN(CC1)C(=O)N  
74 FC(C(Cl)(Cl)Cl)(C(Cl)(F)F)F  
75 OC(=O)Cn1nc2c(n1)cccc2  
76 ClC(=O)CCC[Si](Cl)(Cl)C  
77 c1(c2ccc(cc2)OC)ccc(cc1)OC  
78 Br1ccc(cc1)c1cccc(c1)Cl  
79 CO[Si](OC)(OC)OC  
80 BrCc1onc(c1)Br  
81 c1(c2cncn2)ccn1  
82 NN1C(=S)S[C@H]2[C@@H]1CS(=O)(=O)C2  
83 Nc1ccc2=c3c(=c2c1)cccc3  
84 N#Cc1c(N)onc1c1ccc(cc1)Br  
85 O=Nc1c(N)nc(nc1N)N  
86 Cn1c(COc2cccc2)mmc1S  
87 N#CCSSCCC#N  
88 CCCCCCC[C@H]1CO1  
89 c1(c2cccc2)nc2c(s1)cccc2  
90 CCSc1nccc(c1C#N)c1ccc(cc1)Cl  
91 C=CS(=O)(=O)O  
92 O=C1CNc2c(N1)cnc(n2)N  
93 NC[C@@H]1N[C@H](CCl)CN([C@H]1N)O  
94 N[C@]12C[C@H]3C[C@@H](C2)C[C@@H](C1)C3  
95 c1(C(=O)NC2CC2)cn(nc1)CCC(=O)O  
96 OC(C#CC(C)(C)C)C#CC(C)(C)C  
97 C(C(=C/C=N/C(C)(C)C)C[Si](C)(C)C)[Si](C)(C)C  
98 Fe1ccc2c(c1)c(=O)n1c(n2)CCCC1  
99 C1CC(C1)CNC[C@H]1CCCO1  
100 ClCCNC(=O)N(CCCl)CCCl  
101 O=Cc1cccc1OC  
102 Clc1ncc(nc1)OC  
103 n1(c2ccc(cc2)C)c(ccc1)C=O  
104 ClC[C@@H]1CN(O)[C@H]([C@@H](N1)C#N)N  
105 CCCn1ccc(n1)C=O  
106 c12c3c([nH]c1C(=O)CCC2)cccc3  
107 Nc1ccc(c(c1)Cl)Oc1cc(C)cc(c1)C  
108 c1(c(n[nH]c(=O)n1)C)N/N=C/c1cccc1  
109 c12n(c(nc1cccc2)CC)CC(=O)O  
110 NCCc1c(C)nn(c1N1CCOCC1)C  
111 COCCN(CCCl)CCCl  
112 COS(=O)(=O)OC  
113 n1ccc2[nH]cc(c2c1)Br  
114 BrN1C(=O)CCC1=O

115 c1(/C(=C/C=O)/Cl)cccc(cc1)F  
116 OCc1[nH]c2c(n1)cc1c(c2)[nH]cn1  
117 N[C@H]1CCN(CC1)C(=O)c1cccc1  
118 C[Si]1(C)CCC1  
119 c1(n(nnn1)CCCC)NCc1cccc1  
120 O=C=NC[C@@H]1CCC[C@H](C1)CN=C=O  
121 c1(C(=O)CSc2[nH]c(nn2)N)cccc1  
122 c1ccc(cc1)c1nc2c([nH]1)cccc2  
123 NN1C(=O)CCC1=O  
124 C(#CC=O)[Si](C)(C)C  
125 c1ccc2c(c1)c1cccc1c1c2cccc1  
126 N#CC1=CC[C@]2([C@]1(CC)CC=C2C#N)C  
127 CC(=O)Nc1nc2c(s1)ccc(c2)Br  
128 N#CC(=C(C#N)C#N)C#N  
129 Sc1[nH]c(=O)c2c(n1)n(nc2)c1cccc1  
130 C1CCCC(CC1)NC1CCOCC1  
131 c1(c2ccc(cc2)OC)nc(ncc1)N  
132 Br1ccc(s1)CCc1c[nH]cn1  
133 CCSc1nc(N)cc(=O)[nH]1  
134 n1(c(cc(cc1=O)C)C)N  
135 N[C@@H]1CONC1=O  
136 c12c([nH]c(=S)nc1)CC[C@H](C2)N  
137 N/N=c/1\sc2c([nH]1)c(Cl)cc(c2)Br  
138 c12c(nc([nH]1)CCN)cccc2  
139 OS(=O)(=O)c1ccccn1  
140 [Si](CC)(F)(F)F  
141 Sc1nnc(n1N)S  
142 c1([C@@H](CN2CCN(CC2)C)N)cccc1  
143 CCCCn1ccnc1CNCCOC  
144 [C@@]12(c3c([C@H](C1(C)C)CC2)nnc(n3)S)C  
145 Cc1cc(Nc2cccc2)c2c(n1)c1cccc1cc2  
146 OS(=O)(=O)CCS(=O)(=O)O  
147 NC(=N)N/N=C/1\C=CC(=O)C=C1  
148 C1(=C(N[C@H](N1)C=C)C)C(=O)C  
149 BrC1=CCCS1(=O)=O  
150 C[C@]1(CSC(=O)S1)/C=N/O  
151 FC(c1cc(Cl)c(cc1Cl)C(F)(F)F)(F)F  
152 ClC(=O)CCc1c(F)c(F)c(c(c1F)F)F  
153 ClC(=O)N1CCCCC1  
154 CCCCOP(=O)(OCCCC)OCCCC  
155 Fe1ccc(c(c1)F)Oc1ccc(c(c1)C(F)(F)F)N  
156 Br1csc(c1)Cl  
157 CC(C#C[Si](C)(C)C)(C)C  
158 N1[C@@H](O)CCCC1

159 Clc1cc(nc(n1)C(F)(F)F)N1CCOCC1  
160 C1(C([C@@H]2[C@@H]3[C@H]1[C@@H]1[C@H]2[C@@H]1C3)(C#N)C#N)(C#N)C#N  
161 c1(ccc(cc1)C(=O)O)c1nc(no1)C  
162 c12c(ccc(c1)C(F)(F)F)[nH]c(n2)C  
163 ClCc1ccn1  
164 ON1C[C@@H](C)[C@H]([C@@H](C1)C)[N](=O)O  
165 N=C(Nc1ccccc1)NC(=N)N  
166 C1CN=C(N1)CC2=CC=CC=C2  
167 C=C/C=C/C(C(F)(F)F)(C(F)(F)F)C(F)(F)F  
168 ClCCn1nnc2n(c1=O)cnc2C(=O)N  
169 OC[C@H]1CN1[C@@H](c1ccccc1)C  
170 O=Cc1c2=Nc3c(c2cc2=c4c(=Nc12)cccc4)cccc3  
171 NCCCCC(=O)O  
172 CCCCC/C=C/CCCCCCCC(=O)Cl  
173 c1ccc(cc1)[C@@H]1NN=C(C1)c1ccccc1  
174 CN(S(=O)(=O)N(C)C)C  
175 COc1nc(nc(n1)N)NC(C)(C)C  
176 C12(C(=O)OC[C@H](N1)CC)CCCC2  
177 CSC[C@@H]1CO1  
178 Cc1cc(Br)c(=O)[nH]n1  
179 P(=O)(OCCCC)(OCCCC)CCCC  
180 NCc1nnc(o1)C1CCCC1  
181 CN(S(=O)(=O)N1CCNCC1)C  
182 [C@@H]1([C@H]([C@H](C=C[C@@H]1O)O)O)O  
183 c12c3c(ccc1oc(n2)C)n3  
184 CC(CC([NH3])(C)C)([NH3])C  
185 c12c(sc(c1C)C=O)sc2C  
186 OC(=O)Cn1nnc(n1)N1CCOCC1  
187 O=CN(CCC#N)CCC#N  
188 CO[Si](Cl)(C)C  
189 CCOc1ccc(cc1Cl)F  
190 c12c3c([nH]c1nc(c2)C(=O)OC)cccc3  
191 c1(c(cc(cc1)Br)Br)OCC#N  
192 c1(c(n[nH]c1N)C)Cl  
193 FC(C(C(C([C@]1(F)OC1(F)F)(F)F)(F)F)(F)F)F  
194 n1(c2nc(cc(n2)C)C)nc(cc1C)C  
195 C=CCSc1nc2cc(C)ccn2c(=O)n1  
196 OC(=O)c1c(C)cc(cc1C)C(C)(C)C  
197 c12c(C(=O)c3c(C1=O)cccc3)ccc(c2)C  
198 CN(C(=O)N(C)C)C  
199 Sc1nn2c(s1)nnc(c2=O)C(C)(C)C  
200 c1(c2cc(c(cc2)Cl)Cl)cc(c(cc1)Cl)Cl  
201 [C@H]12[C@H](C(=O)OC1=O)CC=CC2

202 ClC(P(Cl)(Cl)(Cl)Cl)(Cl)Cl  
203 c1ccc2c(c1)c1c3c2cccc3cc2c1cccc2  
204 c1esc(c1)c1cccs1  
205 O=C(CN1CCNCC1)NC1CC1  
206 c1(c2n(c(=O)cc1O)cccc2)C(=O)OC  
207 Clc1ncc(nc1)Cl  
208 CCC(NC(CC)(C)C)(C)C  
209 CCCN1CCC(CC1)NC[C@H]1CCCO1  
210 S(=O)(=O)(c1ccc(N2CCNCC2)cc1)N  
211 CCCCCCCCCCCCCCP(=O)(O)O  
212 S=C=Nc1ccc(cc1C)C(C)(C)C  
213 ClP1OCCO1  
214 CSCC[C@H]1NCCNC1=O  
215 n1(c(=S)[nH]nc1)N1CCCCC1  
216 Sc1nn2c(s1)nnc(c2=O)C  
217 C1CCc2c(C1)c1CCCc3c1c1e2CCCc1cc3  
218 C1=CC=C(C(=C1)C(=O)N)O  
219 N(=C=NC(C)(C)C)C(C)(C)C  
220 Cc1ccc(cc1)OCc1nnc(s1)N

---



## 2 FIGURES

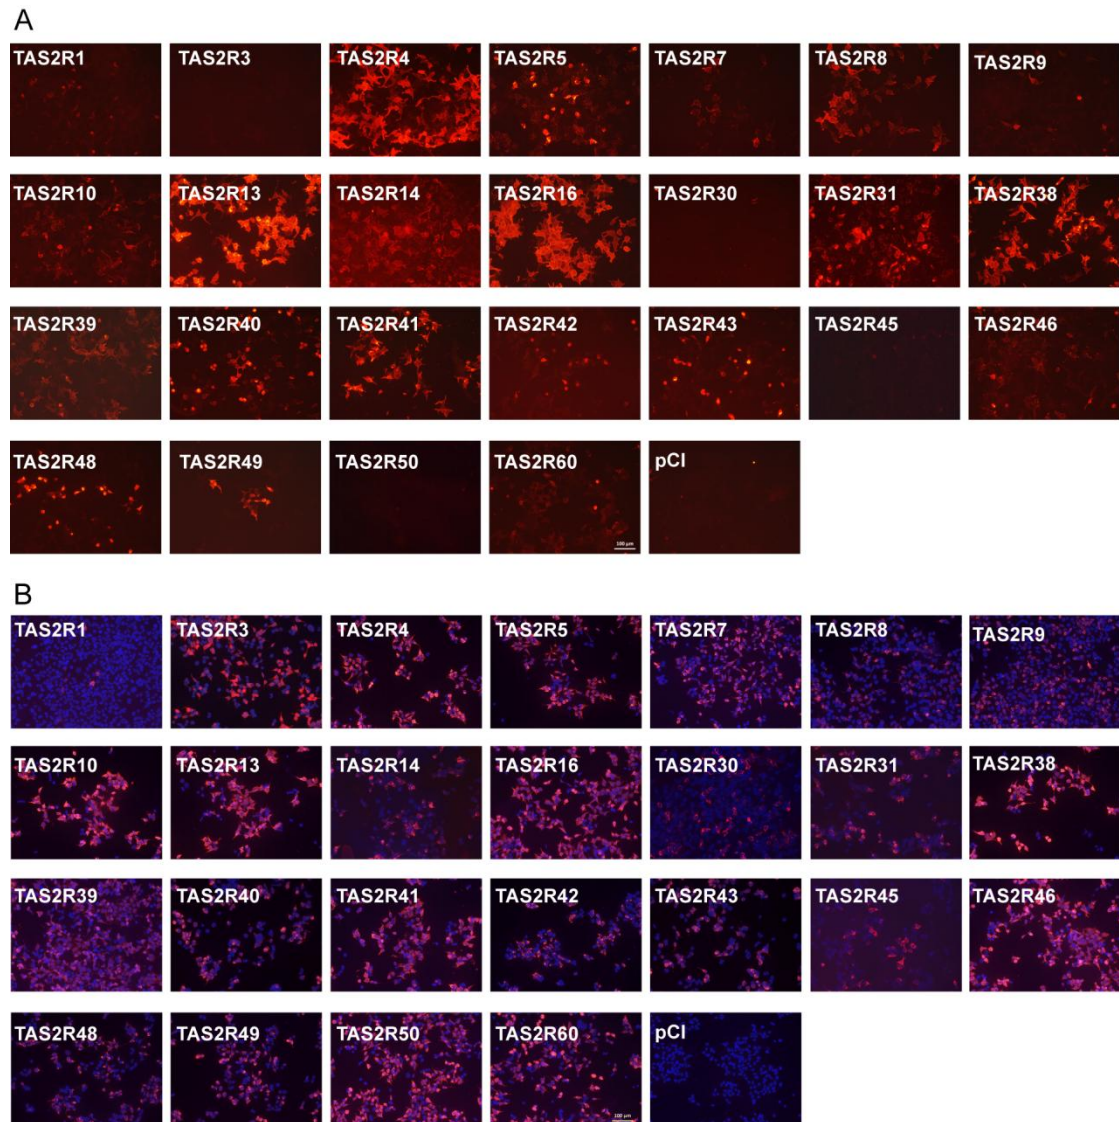

Figure S1. The (A) cell-surface expression and (B) total expression of all TAS2R constructs when transfected into HEK293T cells. For optimal expression, RTP3 were co-transfected with TAS2R7, TAS2R8, TAS2R9, TAS2R40, TAS2R43, and TAS2R49, and RTP4 were co-transfected with TAS2R3, TAS2R42, TAS2R48, and TAS2R60. (Scale bar = 100  $\mu$ m).

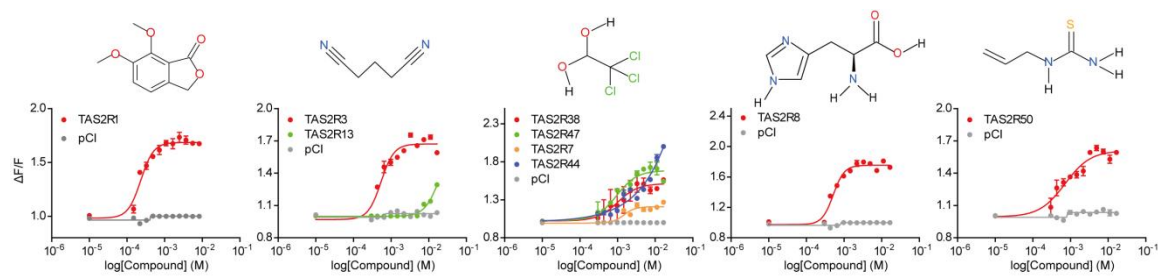

Figure S2. The positive-control dose-response curves of 9 TAS2Rs that tested negative in our system (Ji et al. 2015). y-axis represents  $\Delta F/F \pm \text{SEM}$  ( $N = 2$ ). “pCI” denotes the response of mock-transfected cells to each compound. The structures of the compounds tested are shown above each graph.
